# Supplementary material for: ZDHHC22-mediated mTOR palmitoylation restrains breast cancer growth and endocrine therapy resistance
Source: PubMed Central journal article supplement (PMC9066102; doi:10.7150/ijbs.70544), 2022-04-04
Supplement: ijbsv18p2833s1.pdf [file ijbsv18p2833s1.pdf]

1 **SUPPLEMENTAL FIGURES :**

2 **FIGURE S1.** A. Promoter methylation of ZDHHC22 in 64 breast cancer tissue samples. **B.**  
3 Validation of ZDHHC22 and ZDHHC22-(C111A) mRNA and protein expression by qPCR and  
4 western blot analyses. **C-D.** Cell vitality was detected with CCK-8 assay and colony formation  
5 assay after transfection with Vector, ZDHHC22 and ZDHHC22-(C111A) plasmids in YCC-B1 cells.  
6 **E-F.** Cell cycle and cell apoptosis in YCC-B1 cells at 48 hours post-transfection of Vector,  
7 ZDHHC22 and ZDHHC22-(C111A) plasmids was examined by flow cytometry analysis of PI  
8 staining and Annexin V-APC/PI staining, respectively. **G** Immunofluorescence assays were used to  
9 detect the protein expression of PHLPP2 after transfected with ZDHHC22 plasmids. Values  
10 represent mean  $\pm$  SD. from three independent experiments,  $**p < 0.01$ .  $***p < 0.001$ . ZDC22:  
11 ZDHHC22, ZDC22-mut: ZDHHC22-(C111A) mutation.

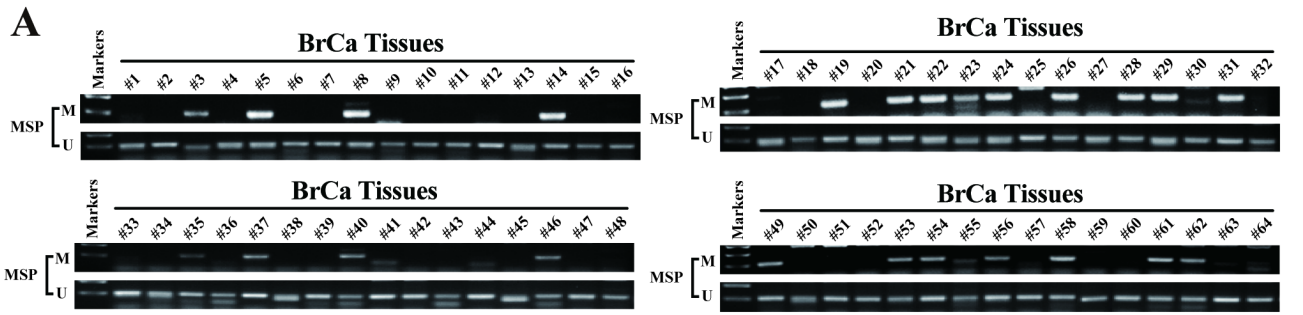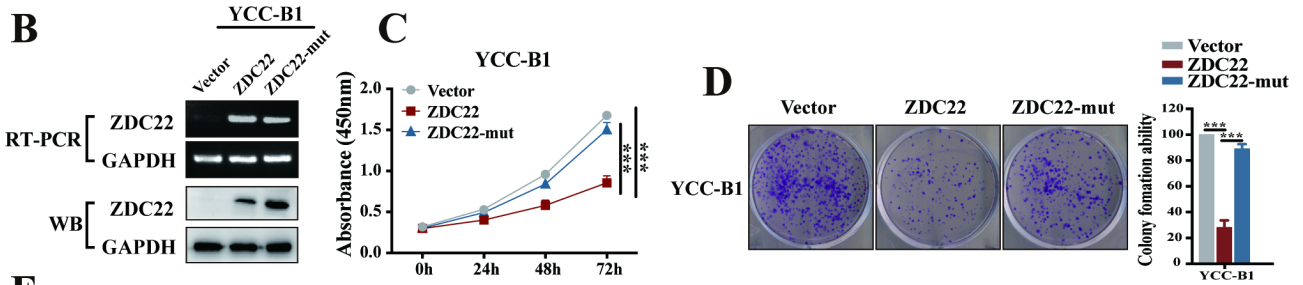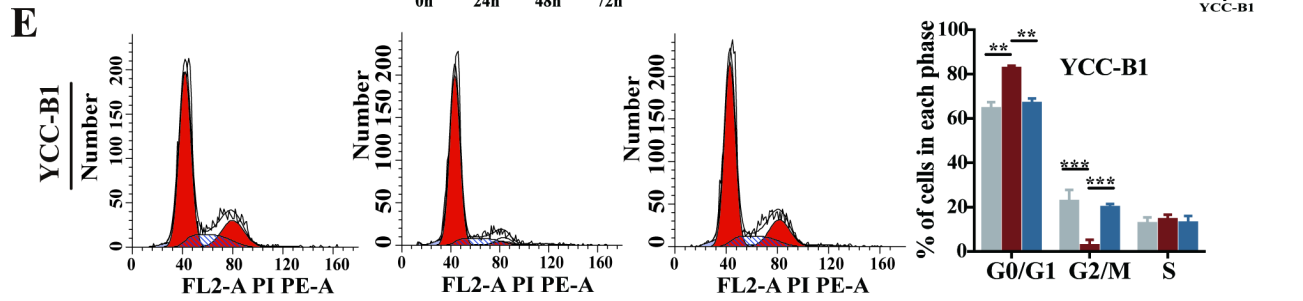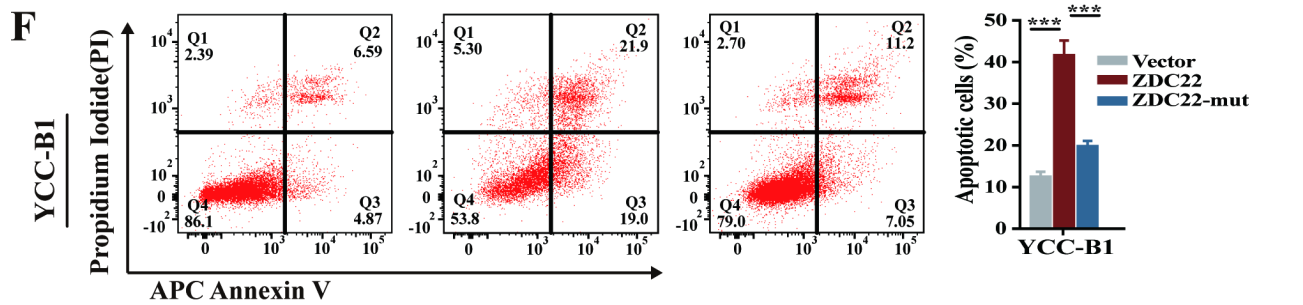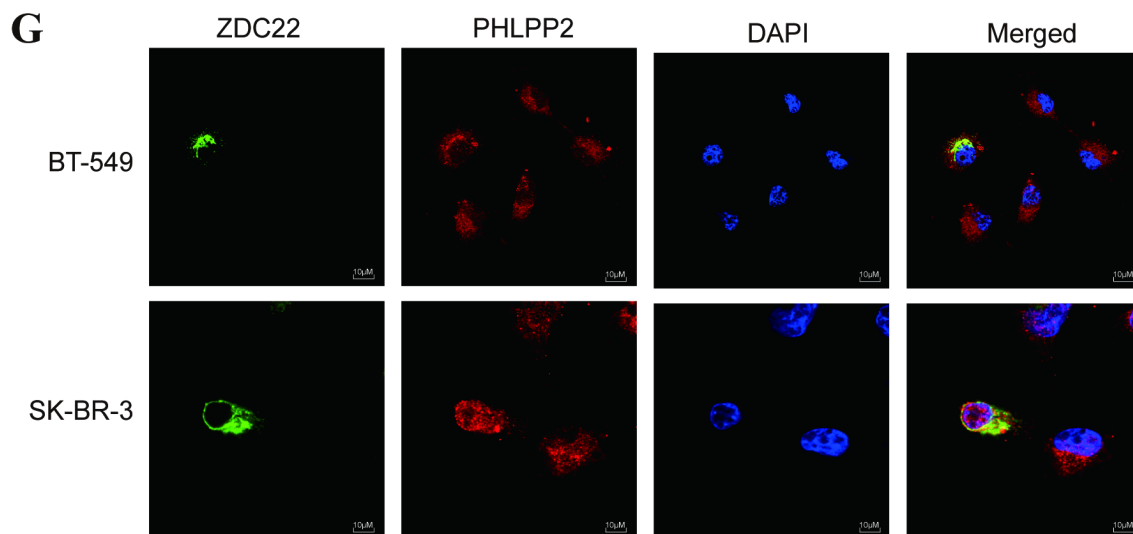

1

2

1 **FIGURE S2. A.** Immunofluorescence assays were used to detect the protein expression and  
2 co-localization of mTOR at the indicated time in BT-549 and SK-BR-3 cells transfected with  
3 ZDHHC22-(C11A) plasmids. **B.** The ZDHHC22 mainly co-localized with the endoplasmic  
4 reticulum. **C.** BT-549 and SK-BR-3 cells were transfected with Vector and ZDHHC22-mut  
5 plasmids for 48 hours, followed by 200µg/ml cycloheximide (CHX) treatment for the indicated  
6 times. mTOR protein expression levels were detected with western blot and quantified with Image J  
7 software. ZDC22:ZDHHC22, ZDC22-mut: ZDHHC22-(C11A) mutation.

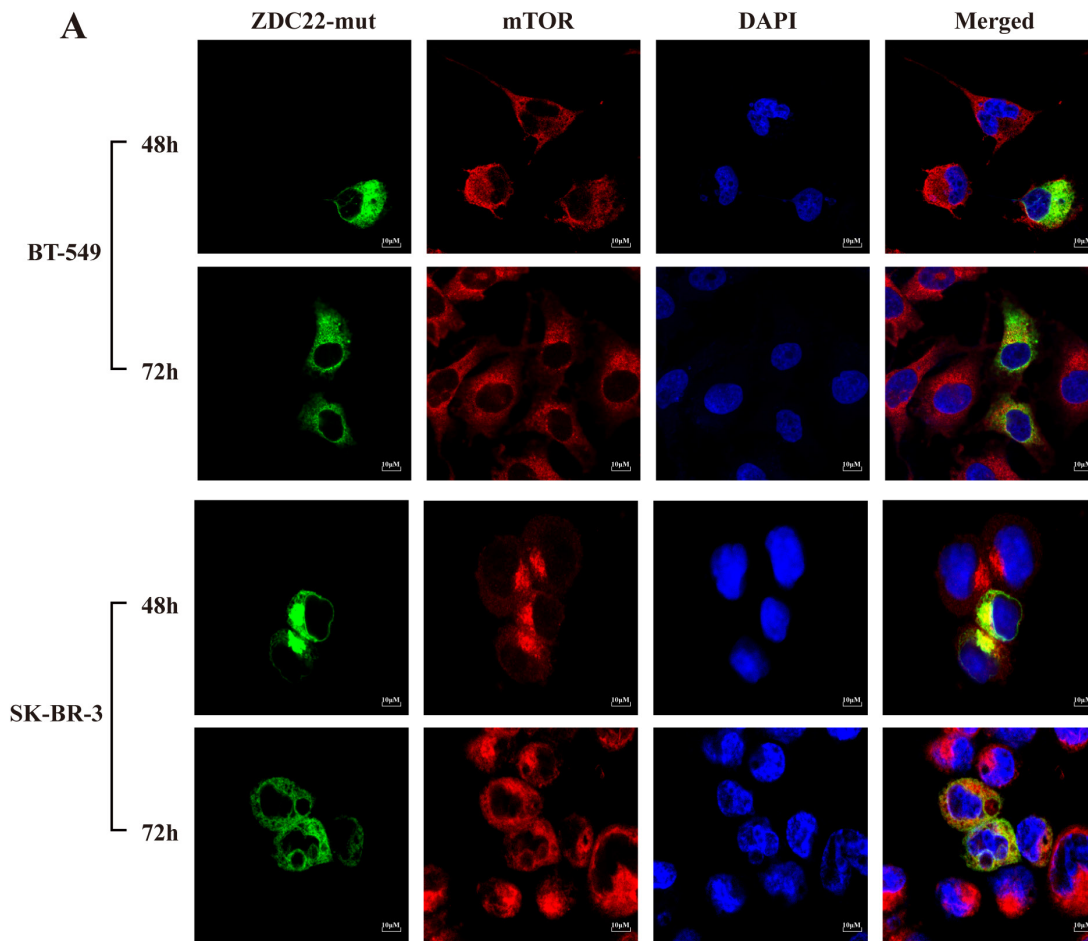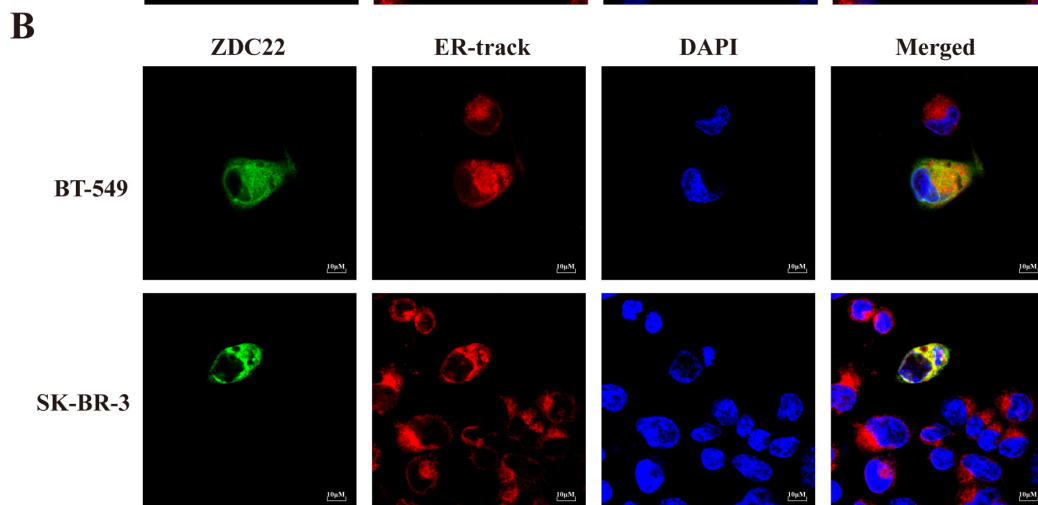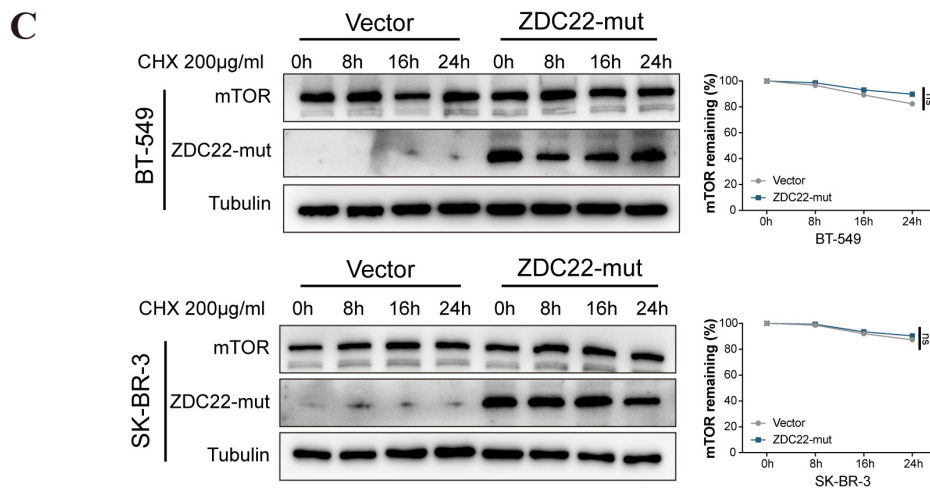

1 **TABLE S1.** List of expression primers used in this study.

| PCR     | Primer   | Sequence (5'-3')      | Product size | PCR Cycles |
|---------|----------|-----------------------|--------------|------------|
| RT-PCR  | ZDHHC22F | GTGACCTTCGTGCTGCAGCT  | 167bp        | 35         |
|         | ZDHHC22R | AGGTCGTCTGGGGAGTTCTG  |              | 35         |
|         | GAPDHF   | GGAGTCAACGGATTTGGT    | 206bp        | 23         |
|         | GAPDHR   | GTGATGGGATTTCCATTGAT  |              | 23         |
| qRT-PCR | mTORF    | TGTGGGCAGCATCACTCTT   | 80bp         |            |
|         | mTORR    | GGCGAACAAATTGGGTCAG   |              |            |
|         | GAPDHF   | CCAGCAAGAGCACAAGAGGAA | 114bp        |            |
|         | GAPDHR   | CAAGGGGTCTACATGGCAACT |              |            |

Note: RT-PCR: Semiquantitative reverse transcription PCR;

qRT-PCR: quantitative real-time PCR.

2

3

1 **TABLE S2.** List of MSP primers used in this study.

| <b>MSP</b> | <b>Primer</b>          | <b>Sequence (5'-3')</b> |
|------------|------------------------|-------------------------|
| ZDHHC22m1  | ATAAGAGGAGTTTCGGACGTC  | 101bp                   |
| ZDHHC22m2  | CCAATTCCCGAAACGAAACG   |                         |
| ZDHHC22u1  | GATAAGAGGAGTTTTGGATGTT | 104bp                   |
| ZDHHC22u2  | ACCCAATTCCCAAACAAAACA  |                         |

Note: MSP: methylation-specific PCR

2

3

1 **TABLE S3.** Prediction of mTORC2 complex and AKT palmitoylation

| <b>Protein</b> | <b>N-terminal sequence or entry code</b> | <b>Predicted N-terminus of the mature protein</b> | <b>Likelihood (%)</b> |
|----------------|------------------------------------------|---------------------------------------------------|-----------------------|
| mTOR           | NP_004949.1                              | *M (1)                                            | 100                   |
| Deptor-X1      | NP_073620.2                              | Ac-M (1)                                          | 100                   |
| Deptor-X2      | NP_001269941.1                           | Ac-M (1)                                          | 100                   |
| Protor1-X1     | NP_851850.1                              | M (1)                                             | 89                    |
| Protor1-X2     | NP_001017528.1                           | AC-S (2)                                          | 85                    |
| Protor1-X3     | NP_00107529.1                            | V (2)                                             | 100                   |
| Protor1-X4     | NP_001185650.1                           | V (2)                                             | 100                   |
| Sin1-X1        | NP_001006618.1                           | Ac-A (2)                                          | 83                    |
| Sin1-X2        | NP_007022.1                              | Ac-A (2)                                          | 83                    |
| Sin1-X3        | NP_001006620.1                           | Ac-A (2)                                          | 83                    |
| Sin1-X4        | NP_001006621.1                           | Ac-T (2)                                          | 77                    |
| Sin1-X5        | NP_001006619.1                           | Ac-A (2)                                          | 83                    |
| mLST8-Xa       | NP_001186102.1                           | Ac-M (1)                                          | 67                    |
| mLST8-Xb       | NP_001186104.1                           | Ac-M (1)                                          | 67                    |
| mLST8-Xc       | NP_001338986.1                           | Ac-M (1)                                          | 67                    |
| mLST8-Xd       | NP_001338988.1                           | M (1)                                             | 89                    |
| Rictor-X1      | NP_689969.2                              | Ac-A (2)                                          | 83                    |
| Rictor-X2      | NP_001272368.1                           | Ac-A (2)                                          | 83                    |
| Rictor-X3      | NP_001272369.1                           | My-G (2)                                          | 45                    |
| AKT-X1         | NP_001014431.1                           | AC-S (2)                                          | 85                    |
| AKT-X2         | NP_001014432.1                           | AC-S (2)                                          | 85                    |
| AKT-X3         | NP_005154.2                              | AC-S (2)                                          | 85                    |

2
